## Baseline interleukin1beta expression in peripheral blood monocytes predicts the extent of weight loss and nonalcoholic fatty liver improvement in obese subjects with prediabetes or type 2 diabetes

P.G. Simeone<sup>1</sup>, S. Costantino<sup>2</sup>, R. Tripaldi<sup>1</sup>, R. Liani<sup>1</sup>, S. Ciotti<sup>1</sup>, A. Tartaro<sup>3</sup>, M.T. Guagnano<sup>1</sup>, F. Cosentino<sup>4</sup>, A. Consoli<sup>1</sup>, F. Paneni<sup>2</sup>, F. Santilli<sup>1</sup>

<sup>1</sup>G. d'Annunzio University, Department of Medicine and Aging, Center for Advanced Studies and Technology (CAST), Chieti, Italy; <sup>2</sup>University Hospital Zurich, Center for Molecular Cardiology and Department of Cardiology, Zurich, Switzerland; <sup>3</sup>University of Chieti-Pescara, Department of Neuroscience & Imaging, Chieti, Italy; <sup>4</sup>Karolinska University Hospital, Cardiology Unit, Department of Medicine, Stockholm, Sweden  
On behalf of Department of Medicine and Aging, Center for Advanced Studies and Technology (CAST), University "G. d'Annunzio" of Chieti-Pescara, 66100 Chieti, Italy

**Funding Acknowledgement:** Type of funding source: Public Institution(s). Main funding source(s): This study was supported by a grant from the Italian Ministry of University and Research (PRIN no. 2010JS3PMZ to F.S.).

**Background:** Non-alcoholic fatty liver disease (NAFLD) represents a hallmark of metabolic syndrome. Interleukin-1 $\beta$  (IL-1 $\beta$ ), a well-studied cytokine involved in obesity-related systemic inflammation as well as in the pathogenesis of type 2 diabetes (T2D), promotes hepatic steatosis by stimulating triglycerides and cholesterol accumulation in primary liver hepatocytes and lipid droplets formation. The most compelling evidence for a major role for IL-1 $\beta$  in metabolic imbalance and inflammation comes from the recent Canakinumab Anti-inflammatory Thrombosis Outcome (CANTOS) trial, where inhibition of IL-1 $\beta$  pathway was associated with a reduction of cardiovascular events in high-risk patients.

**Purpose:** The present study was designed to determine: i) whether an equal degree of weight loss by liraglutide or lifestyle changes has a different impact on NAFLD extent and IL-1 $\beta$  expression in peripheral blood mononuclear cells from obese subjects with prediabetes or early T2D; ii) whether baseline IL-1 $\beta$  levels may predict the extent of weight loss and related metabolic changes.

**Methods:** Thirty-two metformin-treated obese subjects with prediabetes [impaired fasting glucose (IFG) or impaired glucose tolerance (IGT) or both (n=16)] or newly diagnosed T2D (n=16), were randomized to the glucagon-like peptide receptor agonist (GLP-RA) liraglutide (1.8 mg/d) or lifestyle counselling until achieving a modest and comparable weight loss (~7% of initial body weight). Visceral (VAT) and adipose tissue distribution were

assessed by magnetic resonance. Gene expression of IL-1 $\beta$  in peripheral blood mononuclear cells was assessed by real time PCR.

**Results:** At baseline, IL-1 $\beta$  positively correlated to body mass index (BMI) ( $\rho=0.421$ ,  $p=0.016$ ), fasting plasma glucose ( $\rho=0.415$ ,  $p=0.018$ ), HbA1c ( $\rho=0.349$ ,  $p=0.050$ ), VAT ( $\rho=0.388$ ,  $p=0.028$ ), NAFLD ( $\rho=0.454$ ,  $p=0.009$ ), platelet count ( $\rho=0.510$ ,  $p=0.003$ ), chemerin ( $\rho=0.455$ ,  $p=0.009$ ) and interleukin-1 receptor agonist (IL1-RA) ( $\rho=0.519$ ,  $p=0.002$ ). After achievement of the weight loss target in the two groups, a comparable reduction of IL-1 $\beta$  ( $p<0.001$  lifestyle changes;  $p=0.029$  liraglutide treatment) was observed in both arms, in parallel with a comparable improvement in glycaemic control, C-reactive protein (CRP), BMI and NAFLD. Furthermore, basal levels of IL-1 $\beta$  correlated directly with delta BMI ( $p=0.015$ ) and delta NAFLD ( $p=0.002$ ) (Figure 1).

**Conclusion:** In obese patients with initial impairment of glucose metabolism, IL- $\beta$ -driven inflammation correlates with glycaemic control, adipose tissue distribution and platelet count. Successful weight loss, achieved with either lifestyle changes or an incretin-based therapy, is associated with a significant reduction of both IL-1 $\beta$  levels and NAFLD degree. Of interest, basal levels of IL-1 $\beta$  predicts the extent of weight loss and NAFLD improvement, regardless of the intervention. Our results may set the stage for ad-hoc studies investigating the usefulness of baseline IL-1 $\beta$  a levels as a drug-response biomarker.

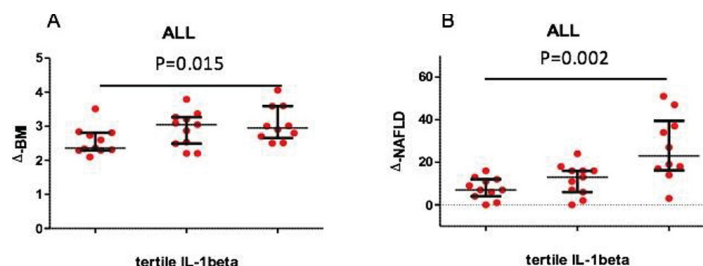

Figure 1
